# Supplementary material for: Visualization of bat “echo space” using acoustic simulation
Source: Research Square preprint supplement (doi:10.21203/rs.3.rs-512467/v1), 2021-06-02
Supplement: Supplementary file 1 [file 51e6f3116f4761df293d1379.docx]

Fig. S1. Overview of visualized individual-specific flight paths, pulse directions and echo incidence points. Flight direction (red solid line), pulse directions (arrows), and echo incidence points (squares) of bats (D, E, F, and G) during the first and last flight. The color of the echo incidence point is the same as the color of the pulse from which the echo incidence point was generated, and its size is proportional to the sound pressure of the echo.

Fig. S2. Time series plots of the turn rate and the pulse and echo direction, respectively. Time series data of the pulse direction (red rhombus plot) and turn rate (black solid line) in the first flight of each bat (left). Time series data of the echo direction (plotted) and turn rate (solid black line) of each bat in the first flight (right). The echo direction plot shows the echo incidence points with the highest sound pressure generated by a single pulse. The color of the echo direction plot depends on the obstacle (acrylic plate) on which the echo incidence is localized: blue indicates the first acrylic plate, green the second, yellow the third, and gray the echo source that is not localized on an obstacle.

Fig. S3. Time series plots of the turn rate and the pulse and echo direction, respectively. Time series data of the pulse direction (red rhombus plot) and turn rate (black solid line) in the last flight of each bat (left). Time series data of the echo direction (plotted) and turn rate (solid black line) of each bat in the last flight (right). The echo direction plot shows the echo incidence points with the highest sound pressure generated by a single pulse. The color of the echo direction plot depends on the obstacle (acrylic plate) on which the echo incidence is localized: blue indicates the first acrylic plate, green the second, yellow the third, and gray the echo source that is not localized on the obstacle.

Fig. S4. Scheme of reflected echoes from an object with edges. When a transmitted pulse is directed straight at an object with edges, the echo consists of a direct wave from a point on the object and diffracted waves from the edges of the object.

Fig. S5. Experimental set-up used for the behavioral experiment. The scheme shows the obstacle course set-up in which bats were allowed to fly repeatedly. A microphone array was used to measure the pulses of the bats, while a video camera was used to measure their flight trajectories.

Fig. S6. Environment for acoustic simulation (FDTD). (A) A two-dimensional space in the x–y plane at z=1.2 m in the corridor separated by the chain of the experimental system of the behavioral experiment was used as the space to be analyzed in the simulation. (B) A sinc function waveform with a flat frequency range up to approximately 110 kHz was used in the simulation as the impulse.

Fig. S7. Source and receiver positions for acoustic simulation and the convolutional signal for echo simulation. (A) In the acoustic simulation, the source positions (red circles) were placed at two points 1.25 mm to the left and right from the pulse emission position obtained from the behavioral experiment. The receiver positions (red triangles) were placed at two points 10 mm to the left and right from the pulse emission position, which is the distance between the two ears of the bat. (B) Overview of convolutional signals (FM signal) created for the simulation of echoes at the receiver positions.

Fig. S8. Overview of simulated echoes and cross-correlation results. a Oscillogram and spectrogram of the pulse used in the simulation. b Oscillogram and spectrogram of a simulated echo at the position of the left receiver. c Oscillogram and spectrogram of a simulated echo at the position of the right receiver. d Cross-correlation results between the pulse and echo at the position of the left receiver. The red circles are the acquired peak positions. e Cross-correlation results between the pulse and echo at the position of the right receiver. The red circles are the acquired peak positions.

Fig. S9. Conceptual diagram of how echo incidence points were calculated using two ellipses.

Table S1. Acoustic simulation parameters

| Courant-Friendrichs-Lewy (CFL) number | | 0.57 |
| --- | --- | --- |
| Space resolution (dx) [mm] | | 0.30 |
| Density [kg/m3] | air | 1.29 |
| acrylic | 1.18 |
| Bulk modulus [Pa] | air | 1.42×105 |
| acrylic | 8.79×109 |

Movie S1 (separate file). The movie depicts the flight path as well as the pulse direction and the simulated echo incidence points. The waveforms in this movie are based on Gaussian monopulses, and the surrounding walls are characterized by Mur's first-order equation. The obstacle course area is 2/25 times smaller than the area in the simulation used in this paper.
